# Supplementary material for: Cis-regulatory properties of medaka synexpression groups
Source: Oxford University Press journal article supplement (doi:10.1242/dev.071803), 2012-02-07

A

| Sublist                  | Category        | Term                                                                            | RT | Genes | Count | %   | P-Value | Benjamini |
|--------------------------|-----------------|---------------------------------------------------------------------------------|----|-------|-------|-----|---------|-----------|
| <input type="checkbox"/> | KEGG_PATHWAY    | <a href="#">DNA replication</a>                                                 | RT |       | 4     | 9.5 | 5.7E-5  | 1.7E-3    |
| <input type="checkbox"/> | BIOCARTA        | <a href="#">p53 Signaling Pathway</a>                                           | RT |       | 3     | 7.1 | 1.8E-4  | 2.4E-3    |
| <input type="checkbox"/> | KEGG_PATHWAY    | <a href="#">Mismatch repair</a>                                                 | RT |       | 3     | 7.1 | 1.1E-3  | 1.6E-2    |
| <input type="checkbox"/> | KEGG_PATHWAY    | <a href="#">Cell cycle</a>                                                      | RT |       | 4     | 9.5 | 2.6E-3  | 2.6E-2    |
| <input type="checkbox"/> | KEGG_PATHWAY    | <a href="#">Nucleotide excision repair</a>                                      | RT |       | 3     | 7.1 | 4.1E-3  | 3.0E-2    |
| <input type="checkbox"/> | BIOCARTA        | <a href="#">Cyclin E Destruction Pathway</a>                                    | RT |       | 2     | 4.8 | 1.5E-2  | 1.0E-1    |
| <input type="checkbox"/> | BIOCARTA        | <a href="#">E2F1 Destruction Pathway</a>                                        | RT |       | 2     | 4.8 | 1.7E-2  | 7.7E-2    |
| <input type="checkbox"/> | BIOCARTA        | <a href="#">Regulation of p27 Phosphorylation during Cell Cycle Progression</a> | RT |       | 2     | 4.8 | 2.0E-2  | 7.0E-2    |
| <input type="checkbox"/> | BIOCARTA        | <a href="#">Cyclins and Cell Cycle Regulation</a>                               | RT |       | 2     | 4.8 | 3.9E-2  | 1.1E-1    |
| <input type="checkbox"/> | BIOCARTA        | <a href="#">Influence of Ras and Rho proteins on G1 to S Transition</a>         | RT |       | 2     | 4.8 | 4.1E-2  | 9.2E-2    |
| <input type="checkbox"/> | BIOCARTA        | <a href="#">Cell Cycle</a>                                                      | RT |       | 2     | 4.8 | 4.2E-2  | 8.3E-2    |
| <input type="checkbox"/> | PANTHER_PATHWAY | P00017:DNA replication                                                          | RT |       | 2     | 4.8 | 4.5E-2  | 3.1E-1    |
| <input type="checkbox"/> | KEGG_PATHWAY    | <a href="#">Purine metabolism</a>                                               | RT |       | 3     | 7.1 | 4.8E-2  | 2.5E-1    |
| <input type="checkbox"/> | KEGG_PATHWAY    | <a href="#">Base excision repair</a>                                            | RT |       | 2     | 4.8 | 8.7E-2  | 3.7E-1    |
| <input type="checkbox"/> | PANTHER_PATHWAY | P00025:Hedgehog signaling pathway                                               | RT |       | 2     | 4.8 | 9.0E-2  | 3.1E-1    |

B

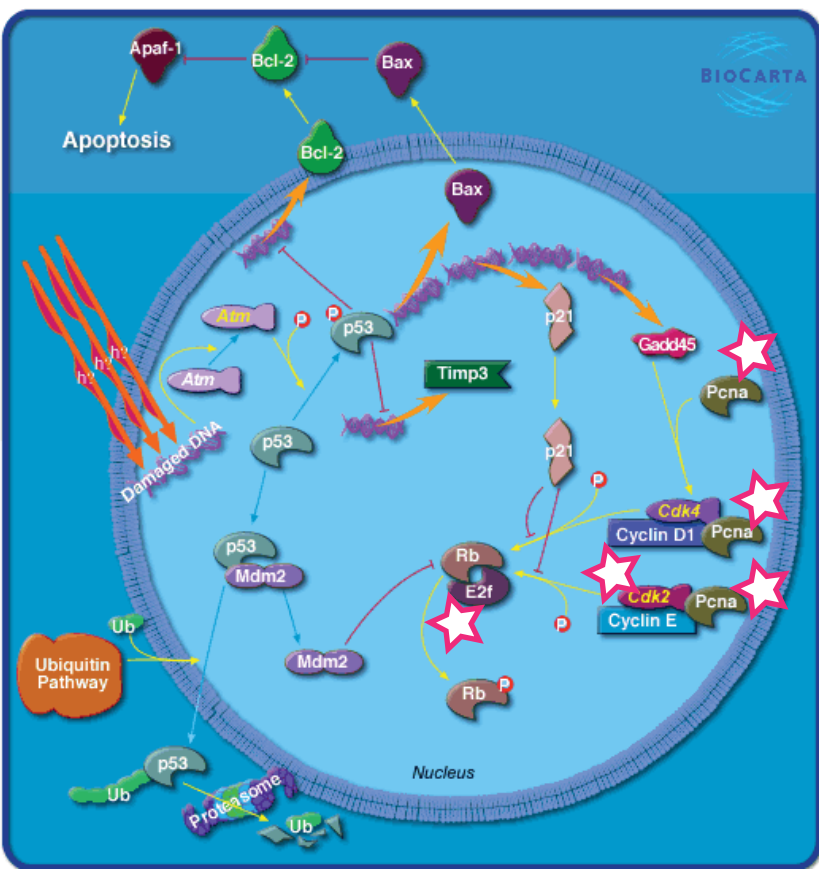

C

Trawler

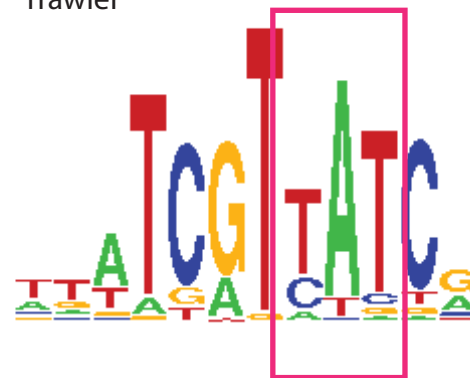

Jaspar

Logo for MA0033.1

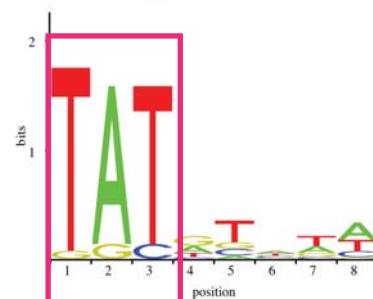

Supplement: dev071803figs3.pdf [file dev071803figs3.pdf]
