# Supplementary material for: Cis-regulatory properties of medaka synexpression groups
Source: Oxford University Press journal article supplement (doi:10.1242/dev.071803), 2012-02-07
Supplement: dev071803tables1-s5.pdf [file dev071803tables1-s5.pdf]

**Table S1. List of medaka synexpression groups with over-represented GO categories and shared DNA motifs**

| Synexpression pattern                                                                                                                                                                                                                               | Best motif Z-score | Best over-represented GO category (corrected <i>P</i> -value) | Number of Ensembl genes | TRN mountains                                                                                                   |
|-----------------------------------------------------------------------------------------------------------------------------------------------------------------------------------------------------------------------------------------------------|--------------------|---------------------------------------------------------------|-------------------------|-----------------------------------------------------------------------------------------------------------------|
| Cardiovascular system                                                                                                                                                                                                                               |                    | Gas transport (0.01540299)                                    | 8                       | TRN33 -                                                                                                         |
| Ciliary marginal zone, forebrain proliferative zone, tectum proliferative zone, cerebellum proliferative zone, rhombic lips, pectoral fin                                                                                                           | 123.15345          | DNA-dependent DNA replication (0.03473054)                    | 10                      | TRN15 -                                                                                                         |
| Ciliary marginal zone, forebrain, midbrain, cerebellum, pectoral fin                                                                                                                                                                                | 33.77132           | Spindle organization and biogenesis (4.827E-03)               | 21                      | TRN50 -                                                                                                         |
| Ciliary marginal zone, forebrain, midbrain, metencephalon, rhombomeres (N4-8), somites, pectoral fin                                                                                                                                                | 15.929607          | Cytosolic ribosome (sensu Eukaryota) (8.254E-03)              | 30                      | TRN05 - TRN04 -                                                                                                 |
| Ciliary marginal zone, forebrain, midbrain, pectoral fin                                                                                                                                                                                            | 10.954736          | Ribosomal subunit (7.705E-04)                                 | 51                      | TRN50 - TRN61 - TRN59 -                                                                                         |
| Ciliary marginal zone, tectum marginal zone                                                                                                                                                                                                         |                    | Nucleobase biosynthetic process (0.01477971)                  | 8                       | TRN18 -                                                                                                         |
| Ciliary marginal zone, tectum marginal zone, tectum proliferative zone                                                                                                                                                                              | 9.52356            | Interphase (7.681E-03)                                        | 87                      | TRN29 - TRN31 - TRN30 - TRN17 - TRN15 - TRN16 - TRN21 - TRN18 - TRN63 - TRN09 -                                 |
| Ciliary marginal zone, tectum proliferative zone                                                                                                                                                                                                    | 16.4812            | DNA-dependent DNA replication (1.703E-03)                     | 36                      | TRN17 - TRN15 - TRN16 - TRN21 -                                                                                 |
| Ciliary marginal zone, tectum proliferative zone, pectoral fin                                                                                                                                                                                      | 18.57839           | DNA-dependent DNA replication (2.89E-04)                      | 26                      | TRN15 - TRN16 - TRN21 -                                                                                         |
| Embryo                                                                                                                                                                                                                                              | 10.329724          | Ribosomal subunit (1.088E-09)                                 | 60                      | TRN01 -                                                                                                         |
| EVL enveloping layer                                                                                                                                                                                                                                | 10.464704          | Intermediate filament cytoskeleton (0.01517016)               | 63                      | TRN19 - TRN20 - TRN10 - TRN08 -                                                                                 |
| Eye, otic vesicle, olfactory system, brain, blood, duct of Cuvier, heart, oral cavity, gut, liver, mesenchyme derived from head neural crest, somites, notochord, epidermis, pectoral fin, tail bud, YSL yolk syncytial layer, EVL enveloping layer | 8.283605           | Cytosolic ribosome (sensu Eukaryota) (7.067E-09)              | 107                     | TRN01 - TRN02 - TRN03 - TRN05 - TRN04 -                                                                         |
| Forebrain, midbrain                                                                                                                                                                                                                                 | 16.971712          | Cytosolic ribosome (sensu Eukaryota) (8.254E-03)              | 31                      | TRN61 - TRN59 -                                                                                                 |
| Forebrain, midbrain, pectoral fin                                                                                                                                                                                                                   | 11.240835          | Ribosomal subunit (6.113E-06)                                 | 66                      | TRN49 - TRN50 - TRN61 - TRN59 -                                                                                 |
| Retina, brain                                                                                                                                                                                                                                       | 13.277704          | Ribosomal subunit (1.281E-03)                                 | 31                      | TRN48 - TRN47 -                                                                                                 |
| Retina, brain, pectoral fin                                                                                                                                                                                                                         | 12.390228          | Ribosomal subunit (2.884E-06)                                 | 40                      | TRN45 - TRN46 - TRN48 - TRN47 -                                                                                 |
| Retina, forebrain, midbrain                                                                                                                                                                                                                         | 41.818764          | Proteasome complex (sensu Eukaryota) (0.0366369)              | 16                      | TRN56 - TRN58 -                                                                                                 |
| Retina, forebrain, midbrain, cerebellum, pectoral fin                                                                                                                                                                                               | 10.43542           | Cytosolic ribosome (sensu Eukaryota) (1.776E-17)              | 113                     | TRN60 - TRN62 - TRN45 - TRN46 - TRN48 - TRN47 - TRN57 - TRN56 - TRN58 - TRN54 - TRN55 - TRN53 - TRN51 - TRN52 - |
| Retina, forebrain, midbrain, cerebellum, rhombomeres (N4-8), liver, pectoral fin,                                                                                                                                                                   | 28.254759          | Cytosolic ribosome (sensu Eukaryota) (1.202E-07)              | 19                      | TRN55 - TRN53 - TRN51 - TRN52 -                                                                                 |
| Retina, forebrain, midbrain, cerebellum, rhombomeres (N4-8), liver, somites, pectoral fin                                                                                                                                                           | 56.364357          | Cytosolic ribosome (sensu Eukaryota) (2.999E-04)              | 15                      | TRN04 -                                                                                                         |
| Retina, forebrain, tectum, cerebellum, heart, oral cavity, pectoral fin                                                                                                                                                                             | 28.529606          | Cytosolic ribosome (sensu Eukaryota) (2.458E-03)              | 23                      | TRN62 -                                                                                                         |
| Retina, forebrain, tectum, cerebellum, pectoral fin                                                                                                                                                                                                 | 41.694447          | Large ribosomal subunit (0.02367476)                          | 14                      | TRN54 -                                                                                                         |
| Somites                                                                                                                                                                                                                                             |                    | Contractile fiber part (0.01075321)                           | 13                      | TRN02 -                                                                                                         |
| Somites, pectoral fin                                                                                                                                                                                                                               | 12.719994          | Contractile fiber (7.608E-05)                                 | 52                      | TRN02 - TRN03 - TRN05 - TRN04 -                                                                                 |

**Table S2. List of medaka synexpression groups with unknown GO category and shared DNA motifs**

| Synexpression pattern                                                           | Best motif Z-score | Number of Ensembl genes | TRN mountains                                                                           |
|---------------------------------------------------------------------------------|--------------------|-------------------------|-----------------------------------------------------------------------------------------|
| Brain                                                                           | 12.419819          | 47                      | TRN39 - TRN42 - TRN41 - TRN43 - TRN44 - TRN40 -                                         |
| Brain, heart                                                                    |                    | 6                       | TRN42 -                                                                                 |
| Brain, pectoral fin                                                             |                    | 8                       | TRN43 -                                                                                 |
| Ciliary marginal zone                                                           | 122.007706         | 10                      | TRN17 -                                                                                 |
| Ciliary marginal zone, brain                                                    |                    | 8                       | TRN40 -                                                                                 |
| Ciliary marginal zone, brain, somites, pectoral fin                             | 76.49878           | 15                      | TRN05 -                                                                                 |
| Epidermis                                                                       | 24.450068          | 24                      | TRN19 - TRN20 -                                                                         |
| Epidermis, EVL enveloping layer                                                 | 113.0007           | 12                      | TRN08 -                                                                                 |
| Epidermis, YSL yolk syncytial layer                                             |                    | 7                       | TRN07 -                                                                                 |
| Eye, midbrain                                                                   |                    | 6                       | TRN29 -                                                                                 |
| Forebrain, midbrain, midbrain hindbrain boundary (MHB), hindbrain               | 9.502161           | 83                      | TRN25 - TRN37 - TRN38 - TRN36 - TRN35 - TRN39 - TRN42 - TRN41 - TRN43 - TRN44 - TRN40 - |
| Forebrain, pectoral fin                                                         | 47.121162          | 17                      | TRN49 -                                                                                 |
| Forebrain, tectum central zone, hindbrain                                       | 111.72649          | 12                      | TRN36 -                                                                                 |
| Gut                                                                             |                    | 10                      | TRN23 -                                                                                 |
| Heart                                                                           | 28.44234           | 20                      | TRN33 - TRN34 - TRN32 -                                                                 |
| Hindbrain                                                                       | 56.968285          | 21                      | TRN26 - TRN27 -                                                                         |
| Midbrain                                                                        | 14.439914          | 30                      | TRN18 - TRN63 - TRN09 -                                                                 |
| Retina, forebrain, midbrain, pectoral fin                                       | 13.837548          | 32                      | TRN57 - TRN56 - TRN58 -                                                                 |
| Retina, forebrain, tectum marginal zone, pectoral fin                           | 52.665             | 16                      | TRN57 -                                                                                 |
| Retina, tectum marginal zone, oral cavity, pectoral fin                         | 86.59573           | 10                      | TRN31 -                                                                                 |
| Retina, tectum marginal zone, pectoral fin                                      | 27.888313          | 18                      | TRN31 - TRN30 -                                                                         |
| Retina, tectum, pectoral fin                                                    | 19.973934          | 24                      | TRN29 - TRN31 - TRN30 -                                                                 |
| Telencephalon                                                                   |                    | 13                      | TRN22 -                                                                                 |
| Telencephalon, diencephalon, tectum proliferative zone, hindbrain, pectoral fin | 51.76166           | 15                      | TRN25 - TRN37 -                                                                         |
| Telencephalon, tectum proliferative zone, hindbrain, pectoral fin               |                    | 11                      | TRN25 -                                                                                 |
| YSL yolk syncytial layer                                                        | 13.489273          | 40                      | TRN06 - TRN07 -                                                                         |

**Table S3. Co-expressed genes with an over-represented GO category but no motif**

| Synexpression pattern                                                                                                                                    | Best over-represented GO category (corrected <i>P</i> -value) | Number of Ensembl genes | TRN mountains                                                                                                                                                                                                                                                                                                                                                                                                                                                                                                           |
|----------------------------------------------------------------------------------------------------------------------------------------------------------|---------------------------------------------------------------|-------------------------|-------------------------------------------------------------------------------------------------------------------------------------------------------------------------------------------------------------------------------------------------------------------------------------------------------------------------------------------------------------------------------------------------------------------------------------------------------------------------------------------------------------------------|
| Forebrain proliferative zone, forebrain marginal zone, telencephalon, diencephalon, tectum central zone, tectum marginal zone, tectum proliferative zone | Cytosolic ribosome (sensu Eukaryota) (2.273E-24)              | 557                     | TRN06 - TRN07 - TRN19 - TRN20 - TRN10 - TRN08 - TRN13 - TRN33 - TRN34 - TRN32 - TRN28 - TRN24 - TRN12 - TRN23 - TRN11 - TRN14 - TRN01 - TRN02 - TRN03 - TRN05 - TRN04 - TRN29 - TRN31 - TRN30 - TRN17 - TRN15 - TRN16 - TRN21 - TRN18 - TRN63 - TRN09 - TRN26 - TRN27 - TRN22 - TRN25 - TRN37 - TRN38 - TRN36 - TRN35 - TRN39 - TRN42 - TRN41 - TRN43 - TRN44 - TRN40 - TRN49 - TRN50 - TRN61 - TRN59 - TRN60 - TRN62 - TRN45 - TRN46 - TRN48 - TRN47 - TRN57 - TRN56 - TRN58 - TRN54 - TRN55 - TRN53 - TRN51 - TRN52 - |
| Ciliary marginal zone, ganglion cells, forebrain, midbrain, cerebellum, pectoral fin                                                                     | Cytosolic ribosome (sensu Eukaryota) (2.404E-22)              | 254                     | TRN22 - TRN25 - TRN37 - TRN38 - TRN36 - TRN35 - TRN39 - TRN42 - TRN41 - TRN43 - TRN44 - TRN40 - TRN49 - TRN50 - TRN61 - TRN59 - TRN60 - TRN62 - TRN45 - TRN46 - TRN48 - TRN47 - TRN57 - TRN56 - TRN58 - TRN54 - TRN55 - TRN53 - TRN51 - TRN52 -                                                                                                                                                                                                                                                                         |
| Ciliary marginal zone, forebrain, tectum, cerebellum, pectoral fin                                                                                       | Cytosolic ribosome (sensu Eukaryota) (3.158E-23)              | 479                     | TRN13 - TRN33 - TRN34 - TRN32 - TRN28 - TRN24 - TRN12 - TRN23 - TRN11 - TRN14 - TRN01 - TRN02 - TRN03 - TRN05 - TRN04 - TRN29 - TRN31 - TRN30 - TRN17 - TRN15 - TRN16 - TRN21 - TRN18 - TRN63 - TRN09 - TRN26 - TRN27 - TRN22 - TRN25 - TRN37 - TRN38 - TRN36 - TRN35 - TRN39 - TRN42 - TRN41 - TRN43 - TRN44 - TRN40 - TRN49 - TRN50 - TRN61 - TRN59 - TRN60 - TRN62 - TRN45 - TRN46 - TRN48 - TRN47 - TRN57 - TRN56 - TRN58 - TRN54 - TRN55 - TRN53 - TRN51 - TRN52 -                                                 |
| Ciliary marginal zone, forebrain, midbrain, cerebellum, rhombomeres (N4-8), pectoral fin                                                                 | Cytosolic ribosome (sensu Eukaryota) (8.583E-22)              | 268                     | TRN26 - TRN27 - TRN22 - TRN25 - TRN37 - TRN38 - TRN36 - TRN35 - TRN39 - TRN42 - TRN41 - TRN43 - TRN44 - TRN43 - TRN44 - TRN40 - TRN49 - TRN50 - TRN61 - TRN59 - TRN60 - TRN62 - TRN45 - TRN46 - TRN48 - TRN47 - TRN57 - TRN56 - TRN58 - TRN54 - TRN55 - TRN53 - TRN51 - TRN52 -                                                                                                                                                                                                                                         |
| Retina, forebrain, midbrain, cerebellum, rhombomeres (N4-8), blood, liver, pectoral fin                                                                  | Cytosolic ribosome (sensu Eukaryota) (1.281E-04)              | 3                       | TRN52 -                                                                                                                                                                                                                                                                                                                                                                                                                                                                                                                 |
| Epidermis, pectoral fin                                                                                                                                  | Oxidative phosphorylation (0.01070432)                        | 3                       | TRN20 -                                                                                                                                                                                                                                                                                                                                                                                                                                                                                                                 |

**Table S4. Co-expressed genes with no over-represented motifs or GO category**

| Synexpression pattern                                                                                                                                                                                                                               | Number of Ensembl genes | TRN mountains                                                                                                                                                                                                                                                                                                                                                                                                                                                                                                           |
|-----------------------------------------------------------------------------------------------------------------------------------------------------------------------------------------------------------------------------------------------------|-------------------------|-------------------------------------------------------------------------------------------------------------------------------------------------------------------------------------------------------------------------------------------------------------------------------------------------------------------------------------------------------------------------------------------------------------------------------------------------------------------------------------------------------------------------|
| Eye, otic vesicle, olfactory system, brain, blood, duct of Cuvier, heart, oral cavity, gut, liver, mesenchyme derived from head neural crest, somites, notochord, epidermis, pectoral fin, tail bud, YSL yolk syncytial layer, EVL enveloping layer | 107                     | TRN01 - TRN02 - TRN03 - TRN05 - TRN04 -                                                                                                                                                                                                                                                                                                                                                                                                                                                                                 |
| Ciliary marginal zone, tectum marginal zone, tectum proliferative zone                                                                                                                                                                              | 87                      | TRN29 - TRN31 - TRN30 - TRN17 - TRN15 - TRN16 - TRN21 - TRN18 - TRN63 - TRN09 -                                                                                                                                                                                                                                                                                                                                                                                                                                         |
| Embryo                                                                                                                                                                                                                                              | 60                      | TRN01 -                                                                                                                                                                                                                                                                                                                                                                                                                                                                                                                 |
| Retina, forebrain, midbrain, cerebellum, pectoral fin                                                                                                                                                                                               | 113                     | TRN60 - TRN62 - TRN45 - TRN46 - TRN48 - TRN47 - TRN57 - TRN56 - TRN58 - TRN54 - TRN55 - TRN53 - TRN51 - TRN52 -                                                                                                                                                                                                                                                                                                                                                                                                         |
| EVL enveloping layer                                                                                                                                                                                                                                | 63                      | TRN19 - TRN20 - TRN10 - TRN08 -                                                                                                                                                                                                                                                                                                                                                                                                                                                                                         |
| Ciliary marginal zone, forebrain, midbrain, pectoral fin                                                                                                                                                                                            | 51                      | TRN50 - TRN61 - TRN59 -                                                                                                                                                                                                                                                                                                                                                                                                                                                                                                 |
| Forebrain, midbrain, pectoral fin                                                                                                                                                                                                                   | 66                      | TRN49 - TRN50 - TRN61 - TRN59 -                                                                                                                                                                                                                                                                                                                                                                                                                                                                                         |
| Retina, brain, pectoral fin                                                                                                                                                                                                                         | 40                      | TRN45 - TRN46 - TRN48 - TRN47 -                                                                                                                                                                                                                                                                                                                                                                                                                                                                                         |
| Somites, pectoral fin                                                                                                                                                                                                                               | 52                      | TRN02 - TRN03 - TRN05 - TRN04 -                                                                                                                                                                                                                                                                                                                                                                                                                                                                                         |
| Retina, brain                                                                                                                                                                                                                                       | 31                      | TRN48 - TRN47 -                                                                                                                                                                                                                                                                                                                                                                                                                                                                                                         |
| Ciliary marginal zone, forebrain, midbrain, metencephalon, rhombomeres (N4-8), somites, pectoral fin                                                                                                                                                | 30                      | TRN05 - TRN04 -                                                                                                                                                                                                                                                                                                                                                                                                                                                                                                         |
| Ciliary marginal zone, tectum proliferative zone                                                                                                                                                                                                    | 36                      | TRN17 - TRN15 - TRN16 - TRN21 -                                                                                                                                                                                                                                                                                                                                                                                                                                                                                         |
| Forebrain, midbrain                                                                                                                                                                                                                                 | 31                      | TRN61 - TRN59 -                                                                                                                                                                                                                                                                                                                                                                                                                                                                                                         |
| Ciliary marginal zone, tectum proliferative zone, pectoral fin                                                                                                                                                                                      | 26                      | TRN15 - TRN16 - TRN21 -                                                                                                                                                                                                                                                                                                                                                                                                                                                                                                 |
| Retina, forebrain, midbrain, cerebellum, rhombomeres (N4-8), liver, pectoral fin                                                                                                                                                                    | 19                      | TRN55 - TRN53 - TRN51 - TRN52 -                                                                                                                                                                                                                                                                                                                                                                                                                                                                                         |
| Retina, forebrain, tectum, cerebellum, heart, oral cavity, pectoral fin                                                                                                                                                                             | 23                      | TRN62 -                                                                                                                                                                                                                                                                                                                                                                                                                                                                                                                 |
| Ciliary marginal zone, forebrain, midbrain, cerebellum, pectoral fin                                                                                                                                                                                | 21                      | TRN50 -                                                                                                                                                                                                                                                                                                                                                                                                                                                                                                                 |
| Retina, forebrain, tectum, cerebellum, pectoral fin                                                                                                                                                                                                 | 14                      | TRN54 -                                                                                                                                                                                                                                                                                                                                                                                                                                                                                                                 |
| Retina, forebrain, midbrain                                                                                                                                                                                                                         | 16                      | TRN56 - TRN58 -                                                                                                                                                                                                                                                                                                                                                                                                                                                                                                         |
| Retina, forebrain, midbrain, cerebellum, rhombomeres (N4-8), liver, somites, pectoral fin                                                                                                                                                           | 15                      | TRN04 -                                                                                                                                                                                                                                                                                                                                                                                                                                                                                                                 |
| Ciliary marginal zone, forebrain proliferative zone, tectum proliferative zone, cerebellum proliferative zone, rhombic lips, pectoral fin                                                                                                           | 10                      | TRN15 -                                                                                                                                                                                                                                                                                                                                                                                                                                                                                                                 |
| Somites                                                                                                                                                                                                                                             | 13                      | TRN02 -                                                                                                                                                                                                                                                                                                                                                                                                                                                                                                                 |
| Cardiovascular system                                                                                                                                                                                                                               | 8                       | TRN33 -                                                                                                                                                                                                                                                                                                                                                                                                                                                                                                                 |
| Ciliary marginal zone, tectum marginal zone                                                                                                                                                                                                         | 8                       | TRN18 -                                                                                                                                                                                                                                                                                                                                                                                                                                                                                                                 |
| Forebrain proliferative zone, forebrain marginal zone, telencephalon, diencephalon, tectum central zone, tectum marginal zone, tectum proliferative zone                                                                                            | 557                     | TRN06 - TRN07 - TRN19 - TRN20 - TRN10 - TRN08 - TRN13 - TRN33 - TRN34 - TRN32 - TRN28 - TRN24 - TRN12 - TRN23 - TRN11 - TRN14 - TRN01 - TRN02 - TRN03 - TRN05 - TRN04 - TRN29 - TRN31 - TRN30 - TRN17 - TRN15 - TRN16 - TRN21 - TRN18 - TRN63 - TRN09 - TRN26 - TRN27 - TRN22 - TRN25 - TRN37 - TRN38 - TRN36 - TRN35 - TRN39 - TRN42 - TRN41 - TRN43 - TRN44 - TRN40 - TRN49 - TRN50 - TRN61 - TRN59 - TRN60 - TRN62 - TRN45 - TRN46 - TRN48 - TRN47 - TRN57 - TRN56 - TRN58 - TRN54 - TRN55 - TRN53 - TRN51 - TRN52 - |
| Ciliary marginal zone, ganglion cells, forebrain, midbrain, cerebellum, pectoral fin                                                                                                                                                                | 254                     | TRN22 - TRN25 - TRN37 - TRN38 - TRN36 - TRN35 - TRN39 - TRN42 - TRN41 - TRN43 - TRN44 - TRN40 - TRN49 - TRN50 - TRN61 - TRN59 - TRN60 - TRN62 - TRN45 - TRN46 - TRN48 - TRN47 - TRN57 - TRN56 - TRN58 - TRN54 - TRN55 - TRN53 - TRN51 - TRN52 -                                                                                                                                                                                                                                                                         |
| Ciliary marginal zone, forebrain, tectum, cerebellum, pectoral fin                                                                                                                                                                                  | 479                     | TRN13 - TRN33 - TRN34 - TRN32 - TRN28 - TRN24 - TRN12 - TRN23 - TRN11 - TRN14 - TRN01 - TRN02 - TRN03 - TRN05 - TRN04 - TRN29 - TRN31 - TRN30 - TRN17 - TRN15 - TRN16 - TRN21 - TRN18 - TRN63 - TRN09 - TRN26 - TRN27 - TRN22 - TRN25 - TRN37 - TRN38 - TRN36 - TRN35 - TRN39 - TRN42 - TRN41 - TRN43 - TRN44 - TRN40 - TRN49 - TRN50 - TRN61 - TRN59 - TRN60 - TRN62 - TRN45 - TRN46 - TRN48 - TRN47 - TRN57 - TRN56 - TRN58 - TRN54 - TRN55 - TRN53 - TRN51 - TRN52 -                                                 |
| Ciliary marginal zone, forebrain, midbrain, cerebellum, rhombomeres (N4-8), pectoral fin                                                                                                                                                            | 268                     | TRN26 - TRN27 - TRN22 - TRN25 - TRN37 - TRN38 - TRN36 - TRN35 - TRN39 - TRN42 - TRN41 - TRN43 - TRN44 - TRN40 - TRN49 - TRN50 - TRN61 - TRN59 - TRN60 - TRN62 - TRN45 - TRN46 - TRN48 - TRN47 - TRN57 - TRN56 - TRN58 - TRN54 - TRN55 - TRN53 - TRN51 - TRN52 -                                                                                                                                                                                                                                                         |
| Retina, forebrain, midbrain, cerebellum, rhombomeres (N4-8), blood, liver, pectoral fin                                                                                                                                                             | 3                       | TRN52 -                                                                                                                                                                                                                                                                                                                                                                                                                                                                                                                 |
| Epidermis, pectoral fin                                                                                                                                                                                                                             | 3                       | TRN20 -                                                                                                                                                                                                                                                                                                                                                                                                                                                                                                                 |

**Table S5. List of chromosomally clustered synexpression groups**

| Chromosome    | Location of gene 1:gene 2                  | Number of genes between gene 1 and gene 2 | Number of genes on chromosome | P-value        | Synexpression group                                                                                                                                                                                                                                 |
|---------------|--------------------------------------------|-------------------------------------------|-------------------------------|----------------|-----------------------------------------------------------------------------------------------------------------------------------------------------------------------------------------------------------------------------------------------------|
| <i>I</i>      | <b>31964085-31966685:31982814-31985104</b> | <b>0</b>                                  | <b>914</b>                    | <b>0</b>       | <b><i>EVL enveloping layer</i></b>                                                                                                                                                                                                                  |
| 1             | 22399584-22401061:22919697-22920776        | 9                                         | 914                           | 0.01918        | Hindbrain                                                                                                                                                                                                                                           |
| 1             | 35258525-35469179:35420648-35422989        | Overlapping                               | 914                           | 0              | Retina, forebrain, midbrain, cerebellum, pectoral fin                                                                                                                                                                                               |
| <b>3</b>      | <b>29723585-29732093:29746261-29766150</b> | <b>1</b>                                  | <b>769</b>                    | <b>0.00253</b> | <b>Somites, pectoral fin</b>                                                                                                                                                                                                                        |
| <b>4</b>      | <b>4439844-4447828:4444286-4454478</b>     | <b>Overlapping</b>                        | <b>901</b>                    | <b>0</b>       | <b>Ciliary marginal zone, tectum marginal zone</b>                                                                                                                                                                                                  |
| <b>6</b>      | <b>997648-1004457:1070833-1080623</b>      | <b>3</b>                                  | <b>843</b>                    | <b>0.00695</b> | <b>Somites, pectoral fin</b>                                                                                                                                                                                                                        |
| 7             | 28238465-28318159:28333764-28393594        | 0                                         | 871                           | 0              | Brain                                                                                                                                                                                                                                               |
| 7             | 7406697-7410538:7507084-7510003            | 4                                         | 871                           | 0.00962        | Brain                                                                                                                                                                                                                                               |
| 8             | 8390431-8391008:8411256-8412025            | 3                                         | 956                           | 0.00632        | Cardiovascular system                                                                                                                                                                                                                               |
| 9             | 30630753-30635268:30727688-30834412        | 3                                         | 955                           | 0.00635        | Embryo                                                                                                                                                                                                                                              |
| 11            | 16668308-16672348:16673078-16676632        | 0                                         | 753                           | 0              | Eye, otic vesicle, olfactory system, brain, blood, duct of Cuvier, heart, oral cavity, gut, liver, mesenchyme derived from head neural crest, somites, notochord, epidermis, pectoral fin, tail bud, YSL yolk syncytial layer, EVL enveloping layer |
| 11            | 16598538-16611238:16673078-16676632        | 6                                         | 753                           | 0.01629        | Retina, forebrain, midbrain, pectoral fin                                                                                                                                                                                                           |
| <b>12</b>     | <b>4971162-4981110:4989140-4991292</b>     | <b>1</b>                                  | <b>729</b>                    | <b>0.00268</b> | <b>Retina, forebrain, midbrain, cerebellum, pectoral fin</b>                                                                                                                                                                                        |
| <i>13</i>     | <i>32816315-32817559:32817065-32818077</i> | <i>Overlapping</i>                        | <i>834</i>                    | <i>0</i>       | <i>YSL yolk syncytial layer</i>                                                                                                                                                                                                                     |
| 23            | 3751680-3760493:3780744-3787930            | 0                                         | 471                           | 0              | Somites, pectoral fin                                                                                                                                                                                                                               |
| 24            | 5408324-5411677:5421500-5426821            | 1                                         | 700                           | 0.00311        | Ciliary marginal zone, forebrain, midbrain, pectoral fin                                                                                                                                                                                            |
| <b>24</b>     | <b>9492210-9494923:9665259-9670351</b>     | <b>9</b>                                  | <b>700</b>                    | <b>0.02543</b> | <b>Ciliary marginal zone, tectum proliferative zone, pectoral fin</b>                                                                                                                                                                               |
| Ultracontig88 | 415263-422636:450452-457065                | 1                                         | 21                            | 0.0990         | Ciliary marginal zone                                                                                                                                                                                                                               |
