# Supplementary material for: Cis-regulatory properties of medaka synexpression groups
Source: Oxford University Press journal article supplement (doi:10.1242/dev.071803), 2012-02-07
Supplement: dev071803tables6.pdf [file dev071803tables6.pdf]

## TRN mountains at 1 dpf

| Cluster Label | Remarks                                                | Size | Color |
|---------------|--------------------------------------------------------|------|-------|
| TRN01         | presumptive CNS - YSL yolk syncytial layer             | 12   |       |
| TRN02         | presumptive CNS - tailbud                              | 7    |       |
| TRN03         | presumptive CNS - EVL enveloping layer - tail bud      | 4    |       |
| TRN04         | presumptive CNS - optic vesicle - tail bud             | 21   |       |
| TRN05         | presumptive CNS                                        | 8    |       |
| TRN06         | presumptive CNS - EVL enveloping layer - optic vesicle | 6    |       |
| TRN07         | presumptive CNS - optic vesicle                        | 20   |       |
| TRN08         | paraxial mesoderm                                      | 4    |       |
| TRN09         | mesoderm                                               | 5    |       |
| TRN10         | tail bud                                               | 10   |       |
| TRN11         | optic vesicle                                          | 6    |       |
| TRN12         | EVL enveloping layer                                   | 106  |       |
| TRN13         | YSL yolk syncytial layer                               | 81   |       |
| TRN14         | embryo                                                 | 491  |       |
| TRN15         | ectoderm - tailbud                                     | 5    |       |
| TRN16         | ectoderm                                               | 11   |       |
| TRN17         | neural rod                                             | 11   |       |
| TRN18         | neural rod - tail bud                                  | 4    |       |
