# Supplementary material for: Cis-regulatory properties of medaka synexpression groups
Source: Oxford University Press journal article supplement (doi:10.1242/dev.071803), 2012-02-07
Supplement: dev071803tables7.pdf [file dev071803tables7.pdf]

## TRN mountains at 2 dpf

| Cluster Label | Remarks                                                      | Size | Color |
|---------------|--------------------------------------------------------------|------|-------|
| TRN01         | lens - retina - forebrain - tectum                           | 19   |       |
| TRN02         | forebrain - midbrain - hindbrain                             | 4    |       |
| TRN03         | lens - forebrain - midbrain - hindbbrain                     | 8    |       |
| TRN04         | lens - retina - midbrain - hindbrain                         | 9    |       |
| TRN05         | retina                                                       | 10   |       |
| TRN06         | lens                                                         | 6    |       |
| TRN07         | eye                                                          | 6    |       |
| TRN08         | eye - midbrain                                               | 15   |       |
| TRN09         | lens - retina - tectum                                       | 11   |       |
| TRN10         | hindbrain                                                    | 14   |       |
| TRN11         | retina - tectum                                              | 6    |       |
| TRN12         | midbrain                                                     | 5    |       |
| TRN13         | EVL enveloping layer                                         | 66   |       |
| TRN14         | markers 1                                                    | 13   |       |
| TRN15         | markers 2                                                    | 6    |       |
| TRN16         | YSL yolk syncitial layer                                     | 68   |       |
| TRN17         | otic vesicle - YSL yolk syncitial layer                      | 6    |       |
| TRN18         | lens - midbrain - hindbrain - somites                        | 18   |       |
| TRN19         | lens - forebrain - midbrain - hindbrain - somites            | 5    |       |
| TRN20         | lens - midbrain - hindbrain - somites - EVL enveloping layer | 6    |       |
| TRN21         | lens - retina - forebrain - midbrain - hindbrain - somites   | 7    |       |
| TRN22         | eye - forebrain - midbrain - hinbrain - somites              | 7    |       |
| TRN23         | eye - midbrain - hindbrain - somites                         | 27   |       |
| TRN24         | somites 1-10                                                 | 7    |       |
| TRN25         | somites 1-7                                                  | 13   |       |
| TRN26         | lens - retina - forebrain - tectum - somites                 | 13   |       |
| TRN27         | eye - tectum - somites                                       | 9    |       |
| TRN28         | lens - retina - tectum - metencephalon - somites             | 22   |       |
| TRN29         | lens - somites                                               | 4    |       |
| TRN30         | somites - YSL yolk syncytial layer                           | 4    |       |
| TRN31         | somites                                                      | 10   |       |
| TRN32         | embryo                                                       | 431  |       |
