# Supplementary material for: Cis-regulatory properties of medaka synexpression groups
Source: Oxford University Press journal article supplement (doi:10.1242/dev.071803), 2012-02-07
Supplement: dev071803tables8.pdf [file dev071803tables8.pdf]

| TRN mountains at 4 dpf |                                                                                                                                                |      |       |
|------------------------|------------------------------------------------------------------------------------------------------------------------------------------------|------|-------|
| Cluster Label          | Remarks                                                                                                                                        | Size | Color |
| TRN01                  | embryo                                                                                                                                         | 70   |       |
| TRN02                  | somites                                                                                                                                        | 15   |       |
| TRN03                  | somites - pectoral fins                                                                                                                        | 23   |       |
| TRN04                  | retina - forebrain - cerebellum - rhombomeres - liver - somites - pectoral fins                                                                | 17   |       |
| TRN05                  | ciliary marginal zone - brain - somites - pectoral fins                                                                                        | 15   |       |
| TRN06                  | YSL yolk syncytial layer                                                                                                                       | 55   |       |
| TRN07                  | epidermis - YSL yolk syncytial layer                                                                                                           | 11   |       |
| TRN08                  | epidermis - EVL enveloping layer                                                                                                               | 15   |       |
| TRN09                  | ciliary marginal zone - midbrain                                                                                                               | 22   |       |
| TRN10                  | EVL enveloping layer                                                                                                                           | 79   |       |
| TRN11                  | tail bud                                                                                                                                       | 5    |       |
| TRN12                  | otic vesicle                                                                                                                                   | 14   |       |
| TRN13                  | notochord                                                                                                                                      | 5    |       |
| TRN14                  | single markers                                                                                                                                 | 8    |       |
| TRN15                  | ciliary marginal zone - forebrain proliferative zone - tectum proliferative zone - cerebellum proliferative zone - rhombic lips - pectoral fin | 12   |       |
| TRN16                  | ciliary marginal zone - forebrain proliferative zone - tectum proliferative zone - pectoral fin                                                | 19   |       |
| TRN17                  | ciliary marginal zone                                                                                                                          | 12   |       |
| TRN18                  | ciliary marginal zone - tectum marginal zone                                                                                                   | 10   |       |
| TRN19                  | epidermis                                                                                                                                      | 24   |       |
| TRN20                  | epidermis - pectoral fin                                                                                                                       | 4    |       |
| TRN21                  | ciliary marginal zone - tectum proliferative zone -pectoral fin                                                                                | 4    |       |
| TRN22                  | telencephalon                                                                                                                                  | 14   |       |
| TRN23                  | gut                                                                                                                                            | 13   |       |
| TRN24                  | pineal gland                                                                                                                                   | 6    |       |
| TRN25                  | telencephalon - tectum proliferative zone - hindbrain - pectoral fin                                                                           | 14   |       |
| TRN26                  | hindbrain                                                                                                                                      | 17   |       |
| TRN27                  | midbrain - hindbrain                                                                                                                           | 5    |       |
| TRN28                  | lens epithelium                                                                                                                                | 8    |       |
| TRN29                  | eye - midbrain                                                                                                                                 | 7    |       |
| TRN30                  | retina - midbrain - pectoral fin                                                                                                               | 14   |       |
| TRN31                  | retina                                                                                                                                         | 13   |       |
| TRN32                  | retina - heart                                                                                                                                 | 6    |       |
| TRN33                  | cardiovascular system                                                                                                                          | 9    |       |
| TRN34                  | heart                                                                                                                                          | 15   |       |
| TRN35                  | ciliary marginal zone - forebrain - tectum central zone - midbrain hindbrain boundary - hindbrain                                              | 5    |       |
| TRN36                  | forebrain - tectum central zone - hindbrain                                                                                                    | 13   |       |
| TRN37                  | diencephalon - tectum marginal zone - hindbrain - pectoral fin                                                                                 | 6    |       |
| TRN38                  | forebrain - tectum proliferative zone - hindbrain - pectoral fin                                                                               | 8    |       |
| TRN39                  | nervous system                                                                                                                                 | 8    |       |
| TRN40                  | ciliary marginal zone - brain                                                                                                                  | 11   |       |
| TRN41                  | forebrain - midbrain - hindbrain                                                                                                               | 5    |       |
| TRN42                  | brain - heart                                                                                                                                  | 7    |       |
| TRN43                  | brain - pectoral fin                                                                                                                           | 10   |       |
| TRN44                  | brain                                                                                                                                          | 14   |       |
| TRN45                  | retina - otoliths - olfactory pits - forebrain - midbrain - hindbrain - heart - oral cavity - proctodeum - pectoral fin                        | 7    |       |
| TRN46                  | retina - otoliths - olfactory pits - forebrain - midbrain - hindbrain - heart - oral cavity - pectoral fin                                     | 7    |       |
| TRN47                  | retina -brain - heart                                                                                                                          | 8    |       |
| TRN48                  | retina - brain                                                                                                                                 | 25   |       |
| TRN49                  | forebrain                                                                                                                                      | 21   |       |
| TRN50                  | forebrain - midbrain - cerebellum                                                                                                              | 32   |       |
| TRN51                  | retina - forebrain - midbrain - cerebellum - rhombomeres - liver - pectoral fin                                                                | 7    |       |
| TRN52                  | retina - forebrain - midbrain - cerebellum - rhombomeres - blood - liver - pectoral fin                                                        | 6    |       |
| TRN53                  | retina - forebrain - midbrain - cerebellum - rhombomeres - pectoral fin                                                                        | 11   |       |
| TRN54                  | retina - forebrain - midbrain - cerebellum - pectoral fin                                                                                      | 38   |       |
| TRN55                  | retina - forebrain - midbrain - cerebellum - rhombomeres - gut - pectoral fins                                                                 | 7    |       |
| TRN56                  | retina - forebrain - midbrain                                                                                                                  | 17   |       |
| TRN57                  | retina - forebrain - tectum marginal zone                                                                                                      | 22   |       |
| TRN58                  | retina - forebrain - midbrain - pectoral fin                                                                                                   | 8    |       |
| TRN59                  | forebrain - midbrain - liver                                                                                                                   | 5    |       |
| TRN60                  | retina - forebrain - tectum marginal zone cerebellum - heart - oral cavity                                                                     | 4    |       |
| TRN61                  | forebrain - midbrain                                                                                                                           | 38   |       |
| TRN62                  | retina - forebrain - tectum - cerebellum - heart - pectoral fins                                                                               | 38   |       |
| TRN63                  | tectum - cerebellum                                                                                                                            | 5    |       |
