# Supplementary figures and images for: Cis-regulatory properties of medaka synexpression groups
Source: Oxford University Press journal article supplement (doi:10.1242/dev.071803), 2012-02-07

Anatomical structures

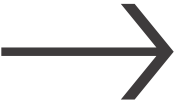

1 dpf                          2 dpf                          4 dpf

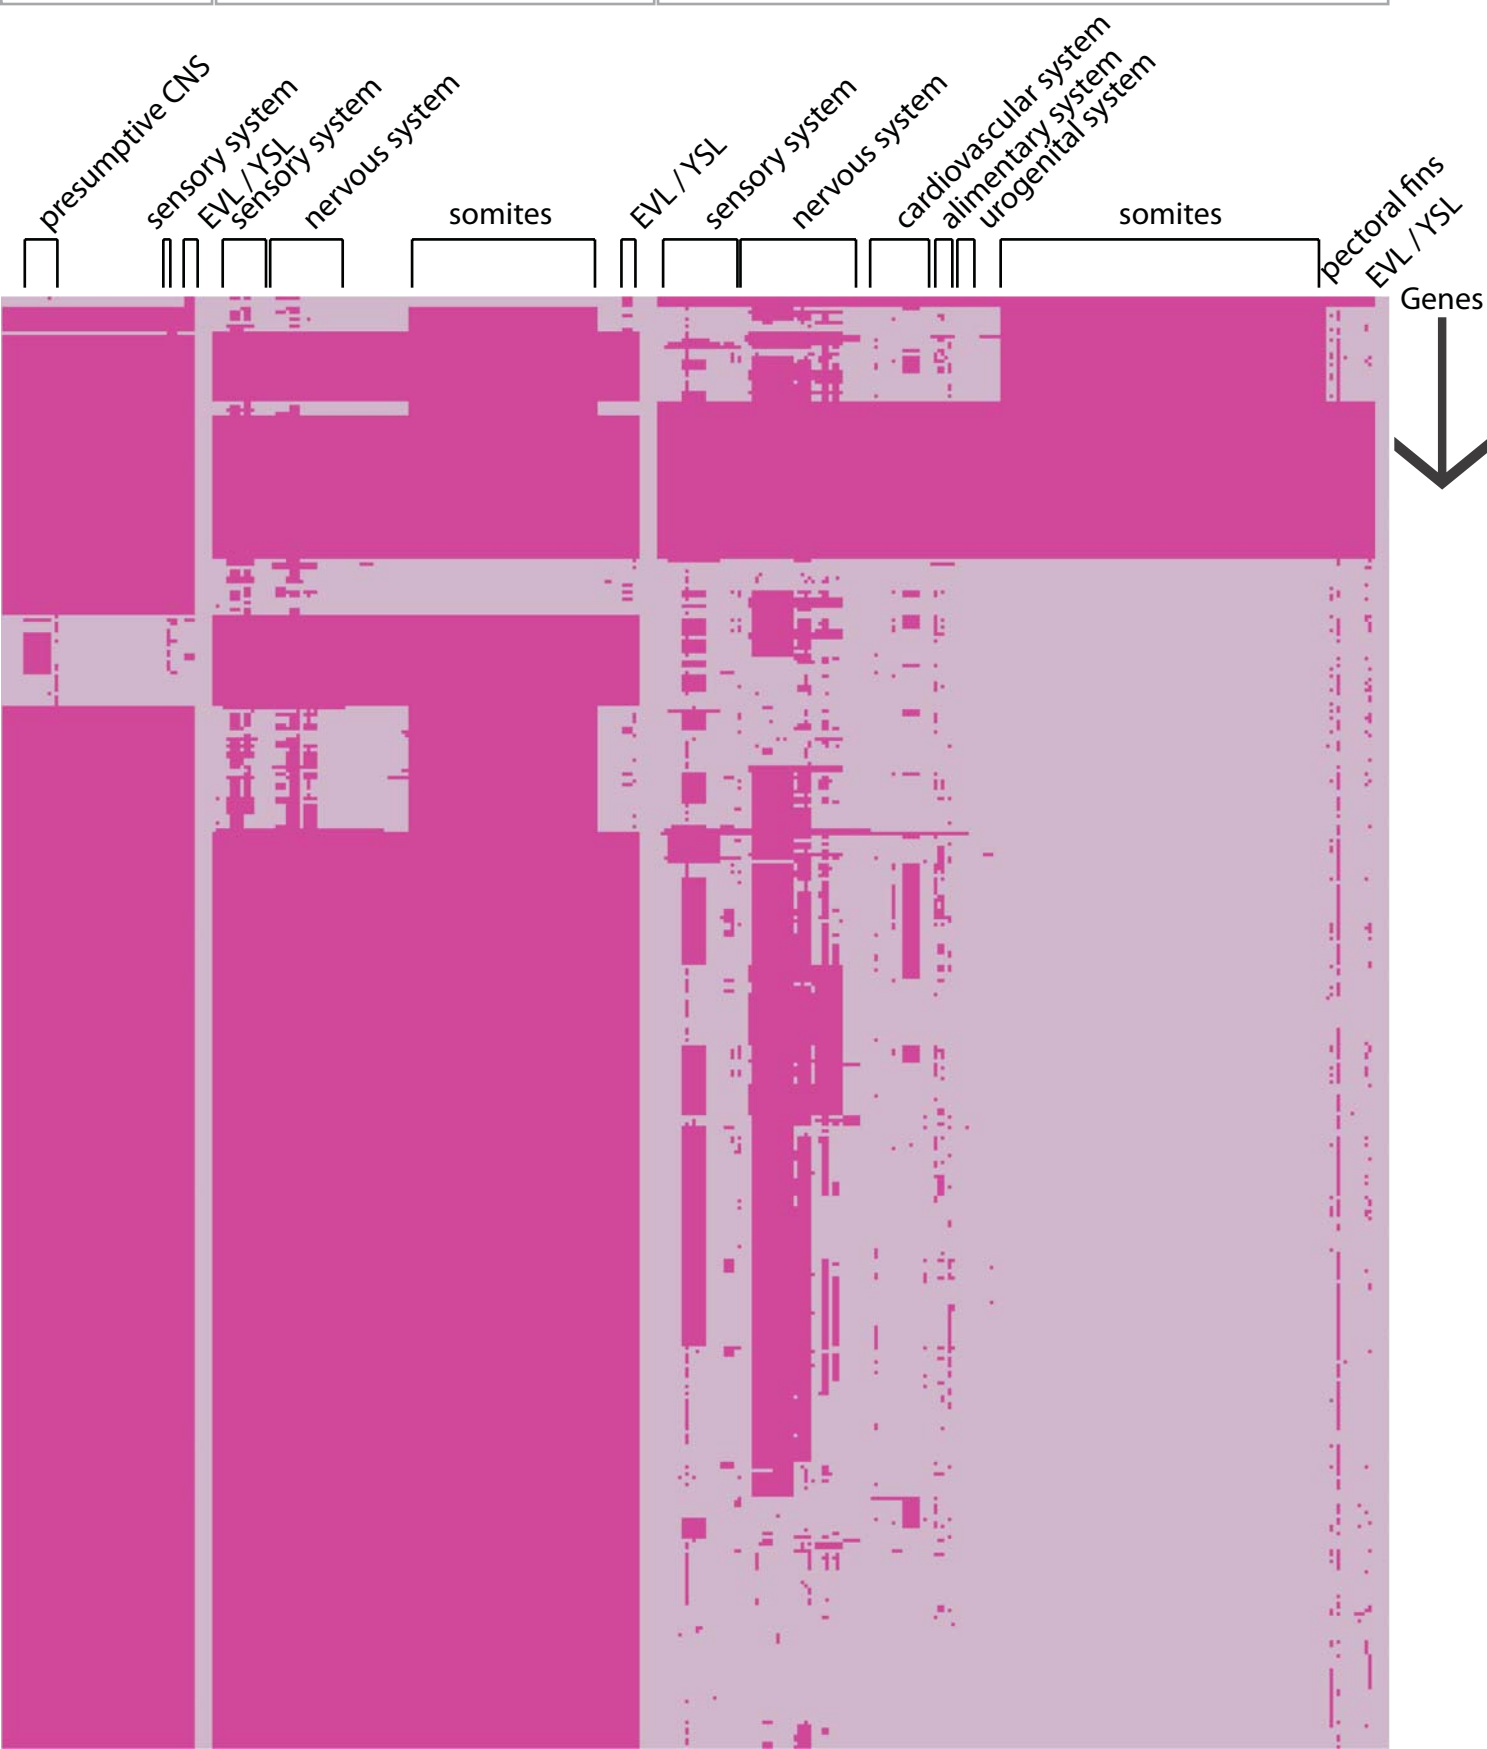

Supplement: dev071803figs1.pdf [file dev071803figs1.pdf]

A

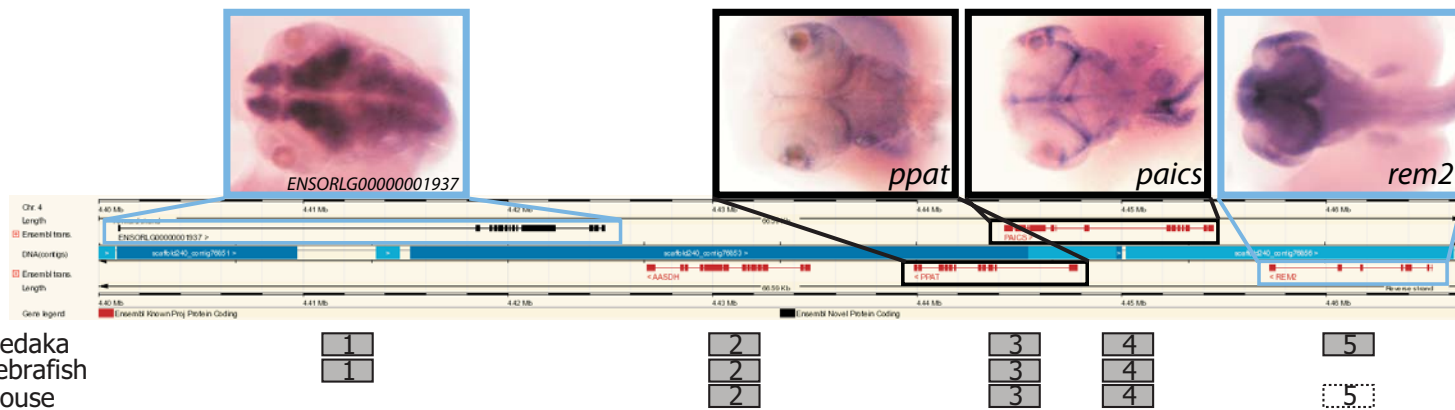

B

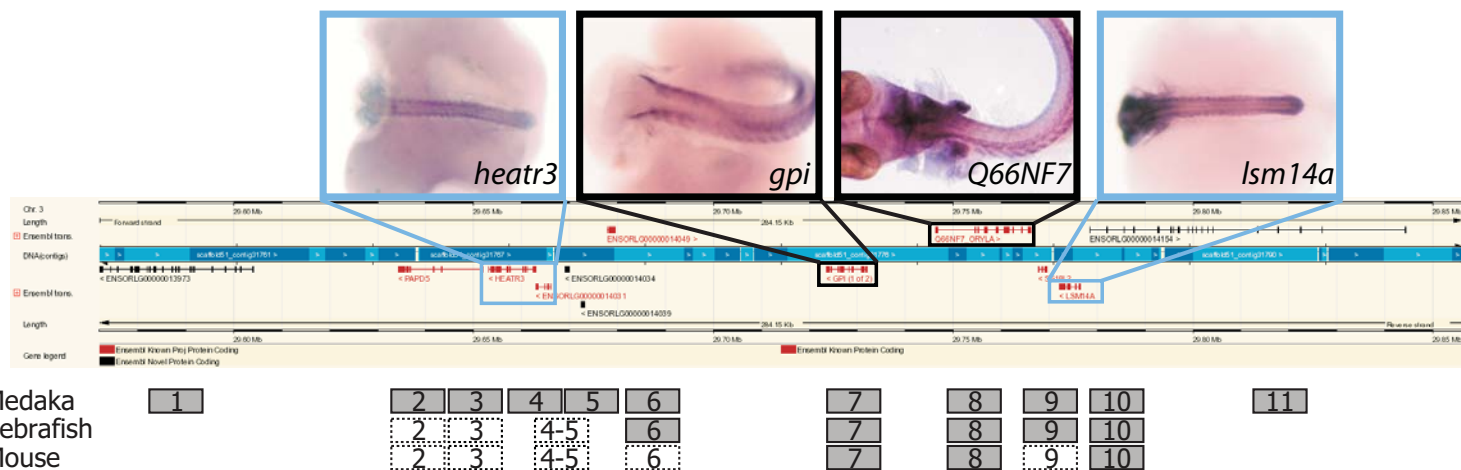

Supplement: dev071803figs4.pdf [file dev071803figs4.pdf]
